# Supplementary material for: Subjective sleep quality and objective sleep physiology in migraineurs: a meta-analysis
Source: bioRxiv or medRxiv preprint supplement (doi:10.1101/2021.03.03.21252791), 2021-03-05
Supplement: Supplementary file [file media-3.pdf]

**Table e-2:** Search strategy for OVID

| Search line number                                                                                                                                                            | Keyword/s                    | Search string      | Number of results |
|-------------------------------------------------------------------------------------------------------------------------------------------------------------------------------|------------------------------|--------------------|-------------------|
| <b>Databases selected:</b> Embase (1974 – 2020), Ovid MEDLINE (R) (1946 – 2020), Global Health (1973 – 2020), APA PsycInfo (1806 – 2020), APA PsycArticles Full Text (- 2020) |                              |                    |                   |
| 1                                                                                                                                                                             | migraine*                    | mp=ti, ab, hw, tn, | 128610            |
| 2                                                                                                                                                                             | MIDAS                        | mp=ti, ab, hw, tn, | 4457              |
| 3                                                                                                                                                                             | Migraine Disability          | mp=ti, ab, hw, tn, | 2154              |
| 4                                                                                                                                                                             | MS-Q                         | mp=ti, ab, hw, tn, | 286               |
| 5                                                                                                                                                                             | HIT-6                        | mp=ti, ab, hw, tn, | 1283              |
| 6                                                                                                                                                                             | Headache Impact Test         | mp=ti, ab, hw, tn, | 1441              |
| 7                                                                                                                                                                             | sleep quality                | mp=ti, ab, hw, tn, | 63290             |
| 8                                                                                                                                                                             | PSQI                         | mp=ti, ab, hw, tn, | 12845             |
| 9                                                                                                                                                                             | Pittsburgh Sleep Quality     | mp=ti, ab, hw, tn, | 22948             |
| 10                                                                                                                                                                            | EEG                          | mp=ti, ab, hw, tn, | 244685            |
| 11                                                                                                                                                                            | electroencephalograph*       | mp=ti, ab, hw, tn, | 333289            |
| 12                                                                                                                                                                            | PSG                          | mp=ti, ab, hw, tn, | 19344             |
| 13                                                                                                                                                                            | polysomnograph*              | mp=ti, ab, hw, tn, | 82692             |
| 14                                                                                                                                                                            | 1 or 2 or 3 or 4 or 5 or 6   |                    | 131646            |
| 15                                                                                                                                                                            | 7 or 8 or 9                  |                    | 63520             |
| 16                                                                                                                                                                            | 10 or 11 or 12 or 13         |                    | 500081            |
| 17                                                                                                                                                                            | 15 or 16                     |                    | 552637            |
| 18                                                                                                                                                                            | 14 and 17                    |                    | 4934              |
| 19                                                                                                                                                                            | Limit 18 to English language |                    | 4155              |
| 20                                                                                                                                                                            | Remove duplicates from 19    |                    | 4089              |
